# Supplementary material
Source: PubMed Central journal article supplement (PMC522617)
Supplement: eukcell_3_5_1169__1.pdf [file eukcell_3_5_1169__1.pdf]

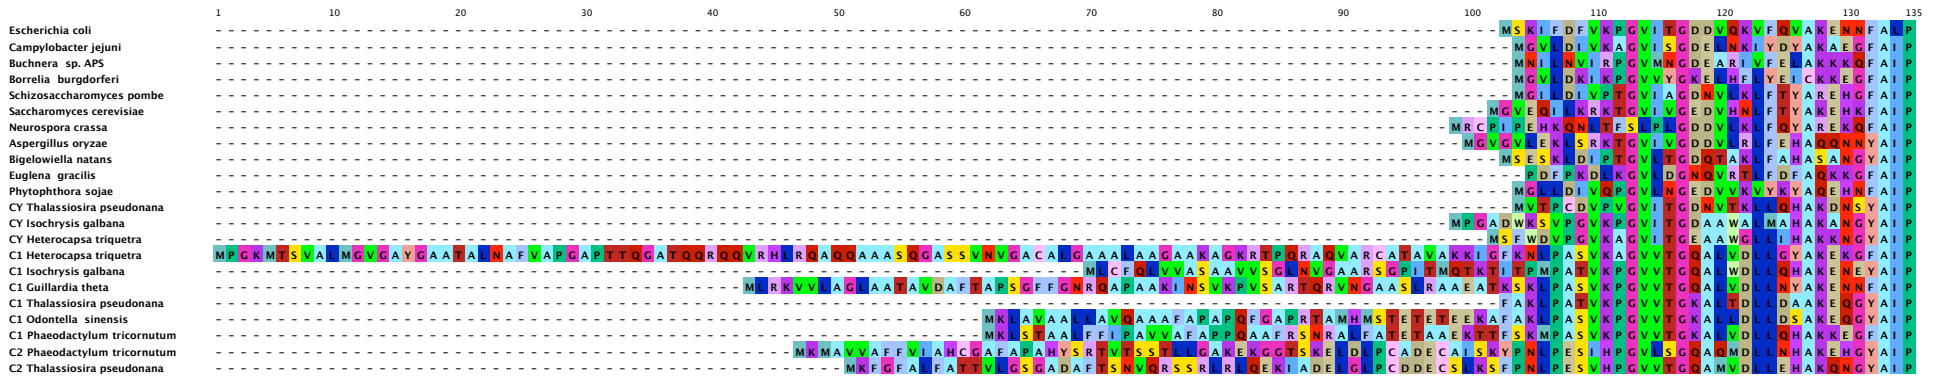

Figure S2A: *Heterocapsa triquetra* C1

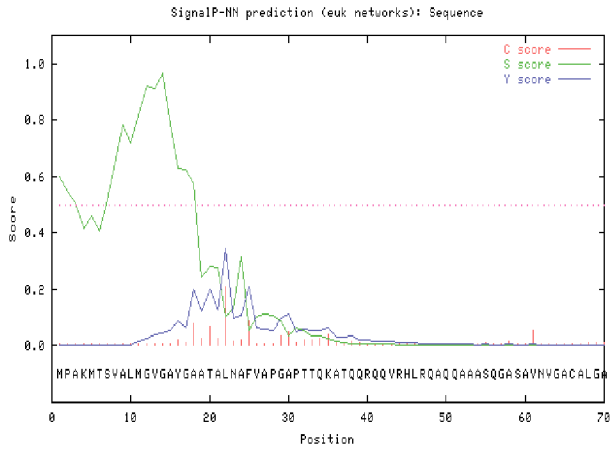

# Measure Position Value Cutoff signal peptide?

max.C 22 0.209 0.32 NO  
 max.Y 22 0.344 0.33 YES  
 max.S 14 0.964 0.87 YES  
 mean S 1-21 0.602 0.48 YES  
 D 1-21 0.473 0.43 YES

# Most likely cleavage site between pos. 21 and 22: ATA-LN

Figure S2B: *Isochrysis galbana* C1

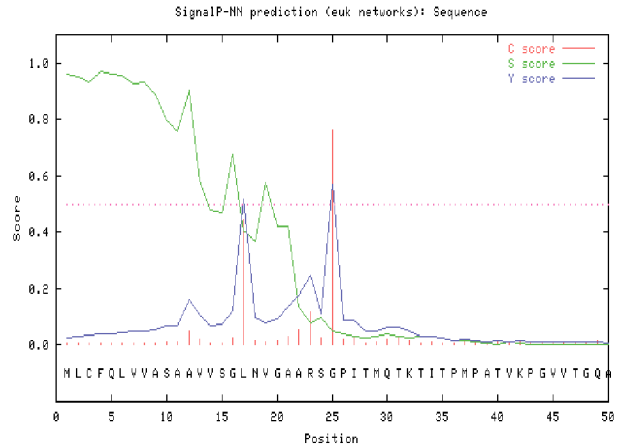

# Measure Position Value Cutoff signal peptide?

max.C 25 0.761 0.32 YES  
 max.Y 25 0.569 0.33 YES  
 max.S 4 0.968 0.87 YES  
 mean S 1-24 0.652 0.48 YES  
 D 1-24 0.610 0.43 YES

# Most likely cleavage site between pos. 24 and 25: ARS-GP

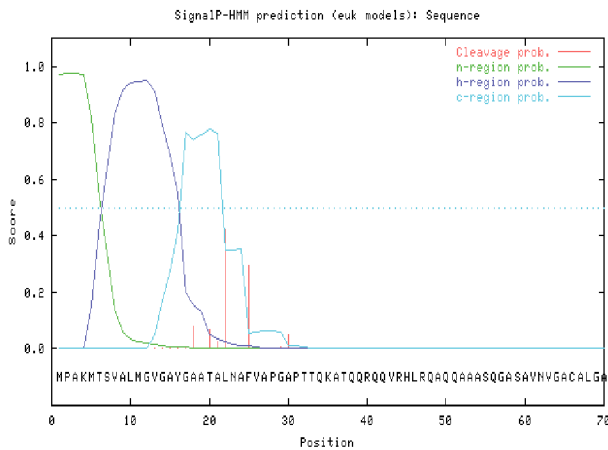

Prediction: Signal peptide

Signal peptide probability: 0.969

Signal anchor probability: 0.005

Max cleavage site probability: 0.423 between pos. 21 and 22

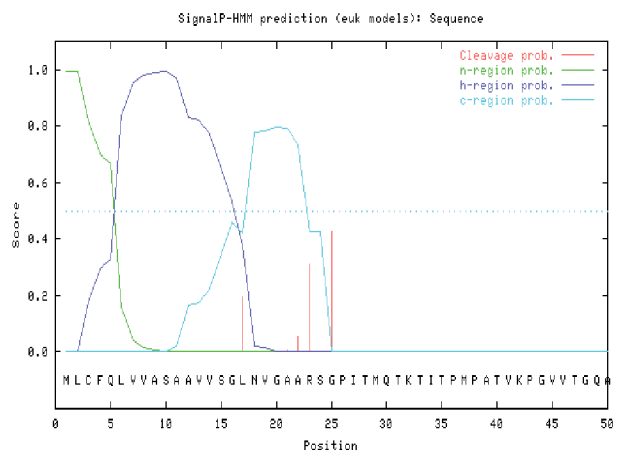

Prediction: Signal peptide

Signal peptide probability: 0.996

Signal anchor probability: 0.000

Max cleavage site probability: 0.424 between pos. 24 and 25

Figure S2C: *Odontella sinensis* C1

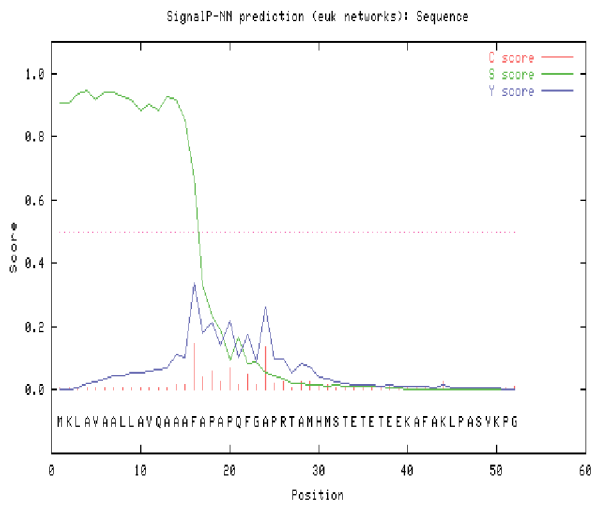

# Measure Position Value Cutoff signal peptide?

max.C 16 0.148 0.32 NO  
 max.Y 16 0.337 0.33 YES  
 max.S 4 0.944 0.87 YES  
 mean S 1-15 0.914 0.48 YES  
 D 1-15 0.625 0.43 YES

# Most likely cleavage site between pos. 15 and 16:AAA-FA

Figure S2D: *Guillardia theta* C1

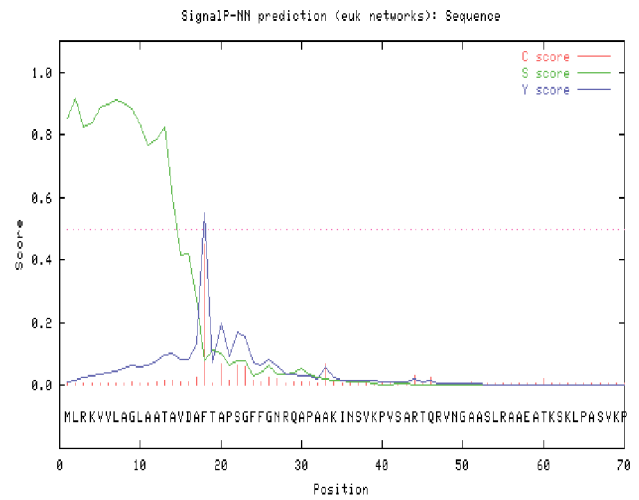

# Measure Position Value Cutoff signal peptide?

max.C 18 0.452 0.32 YES  
 max.Y 18 0.551 0.33 YES  
 max.S 2 0.915 0.87 YES  
 mean S 1-17 0.756 0.48 YES  
 D 1-17 0.653 0.43 YES

# Most likely cleavage site between pos. 17 and 18:VDA-FT

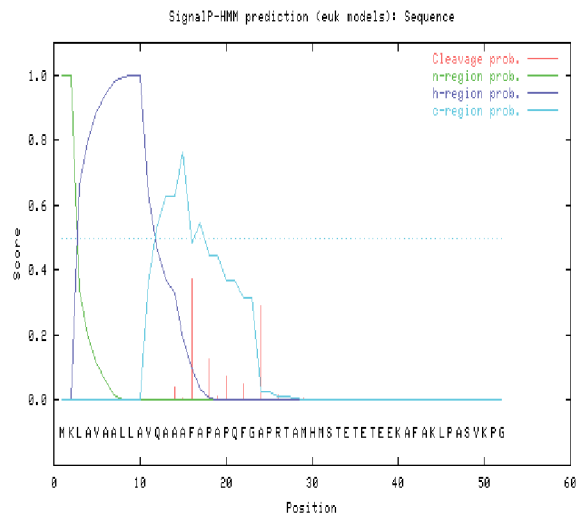

Prediction: Signal peptide

Signal peptide probability: 1.000

Signal anchor probability: 0.000

Max cleavage site probability: 0.373 between pos. 15 and 16

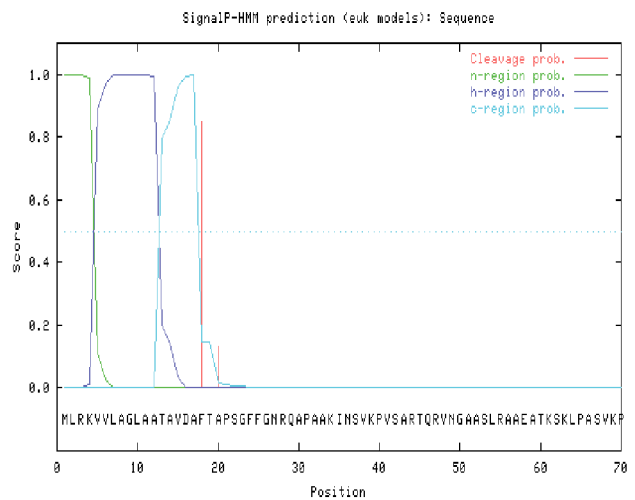

Prediction: Signal peptide

Signal peptide probability: 0.998

Signal anchor probability: 0.000

Max cleavage site probability: 0.852 between pos. 17 and 18

Figure S3A: *Phaeodactylum tricornutum* C2

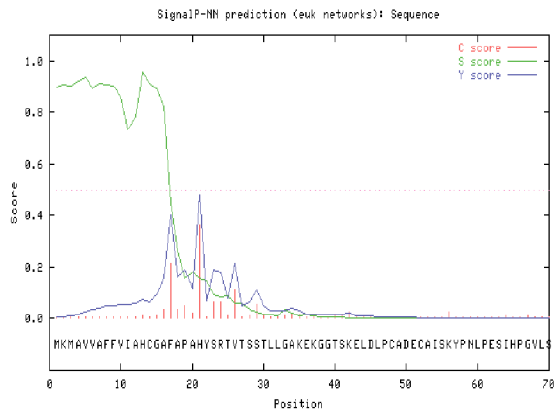

# Measure Position Value Cutoff signal peptide?

max.C 21 0.365 0.32 YES  
 max.Y 21 0.480 0.33 YES  
 max.S 13 0.954 0.87 YES  
 mean S 1-20 0.759 0.48 YES  
 D 1-20 0.620 0.43 YES

# Most likely cleavage site between pos. 20 and 21: APA-HY

Figure S3B: *Thalassiosira pseudonana* C2

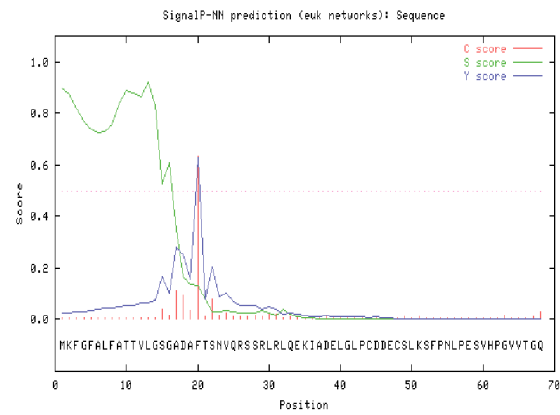

# Measure Position Value Cutoff signal peptide?

max.C 20 0.633 0.32 YES  
 max.Y 20 0.626 0.33 YES  
 max.S 13 0.921 0.87 YES  
 mean S 1-19 0.701 0.48 YES  
 D 1-19 0.664 0.43 YES

# Most likely cleavage site between pos. 19 and 20: ADA-FT

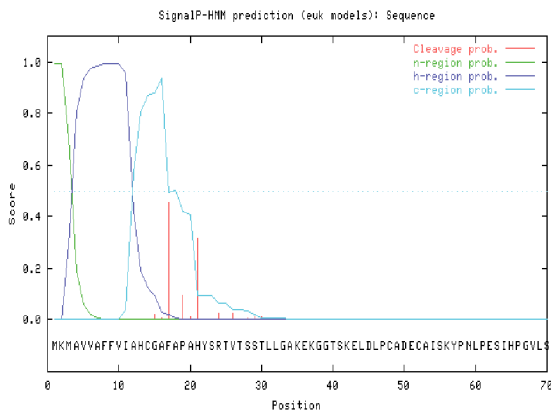

Prediction: Signal peptide

Signal peptide probability: 0.995

Signal anchor probability: 0.000

Max cleavage site probability: 0.456 between pos. 16 and 17

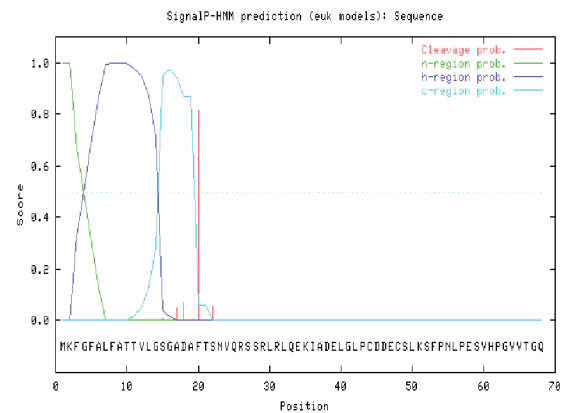

Prediction: Signal peptide

Signal peptide probability: 0.998

Signal anchor probability: 0.000

Max cleavage site probability: 0.814 between pos. 19 and 20

Figure S4A: *Thalassiosira pseudonana* CY

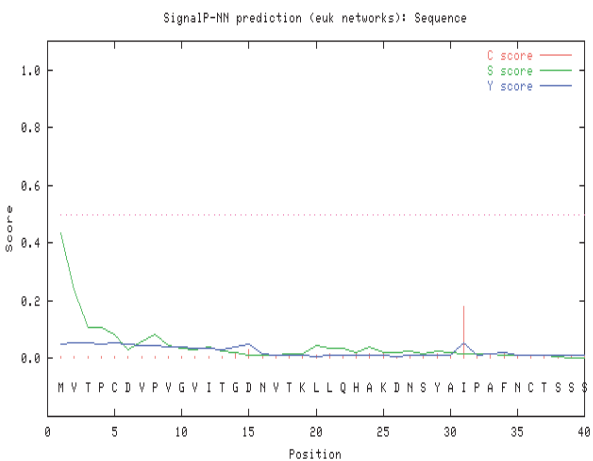

# Measure Position Value Cutoff signal peptide?

max.C 31 0.180 0.32 NO  
 max.Y 31 0.055 0.33 NO  
 max.S 1 0.437 0.87 NO  
 mean S 1-30 0.058 0.48 NO  
 D 1-30 0.056 0.43 NO

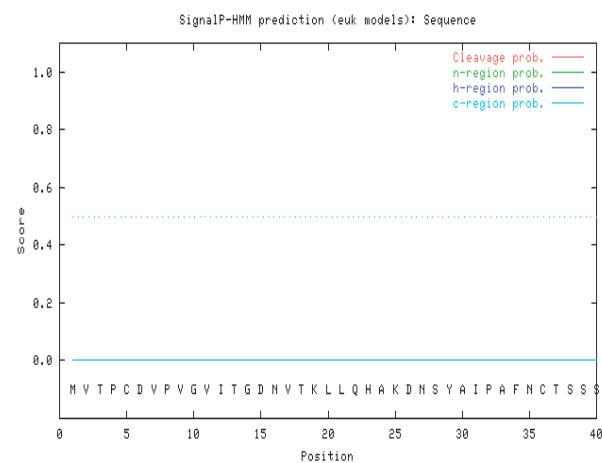

Prediction: Non-secretory protein  
 Signal peptide probability: 0.000  
 Signal anchor probability: 0.000

Figure S4B: *Isochrysis galbana* CY

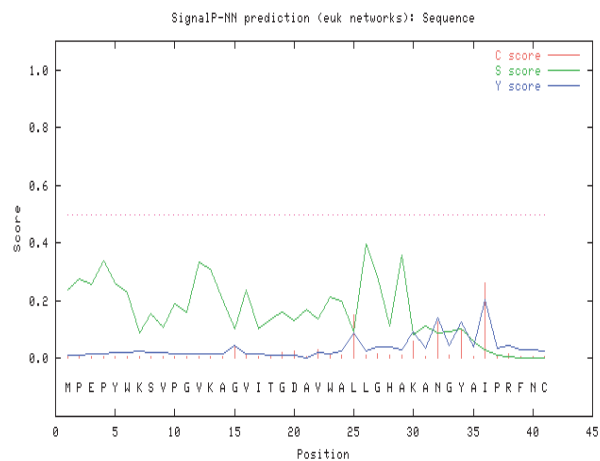

# Measure Position Value Cutoff signal peptide?

max.C 36 0.262 0.32 NO  
 max.Y 36 0.206 0.33 NO  
 max.S 26 0.398 0.87 NO  
 mean S 1-35 0.187 0.48 NO  
 D 1-35 0.197 0.43 NO

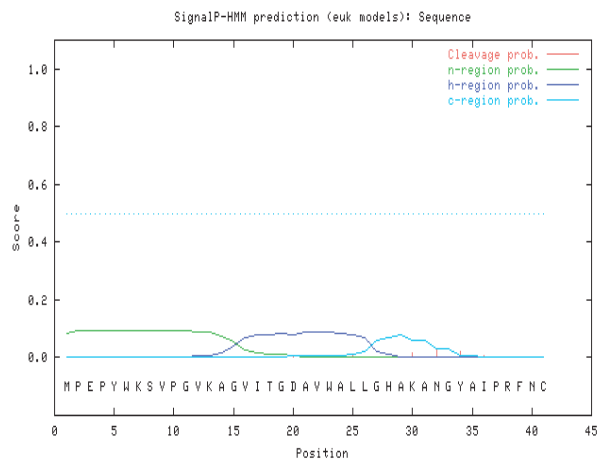

Prediction: Non-secretory protein  
 Signal peptide probability: 0.084  
 Signal anchor probability: 0.011

Figure S4C: *Heterocapsa triquetra* CY

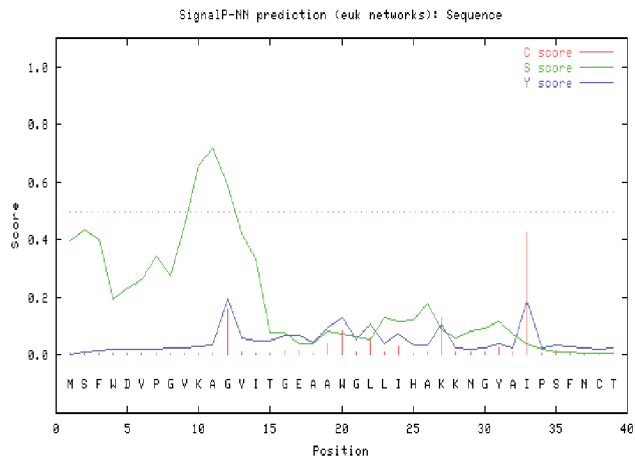

# Measure Position Value Cutoff signal peptide?

|       |      |       |      |     |
|-------|------|-------|------|-----|
| max.C | 33   | 0.428 | 0.32 | YES |
| max.Y | 12   | 0.196 | 0.33 | NO  |
| max.S | 11   | 0.718 | 0.87 | NO  |
| meanS | 1-11 | 0.397 | 0.48 | NO  |
| D     | 1-11 | 0.297 | 0.43 | NO  |

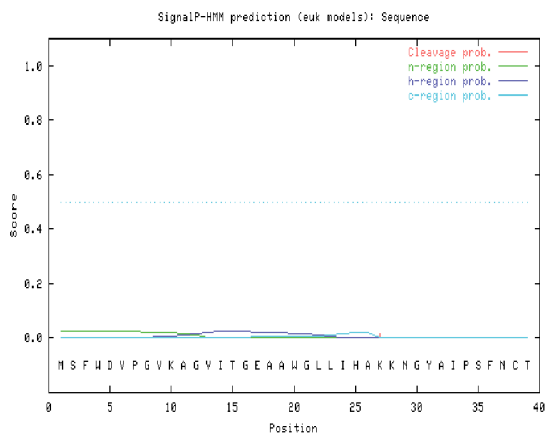

Prediction: Non-secretory protein

Signal peptide probability: 0.027

Signal anchor probability: 0.000

Max cleavage site probability: 0.017 between pos. 26 and 27

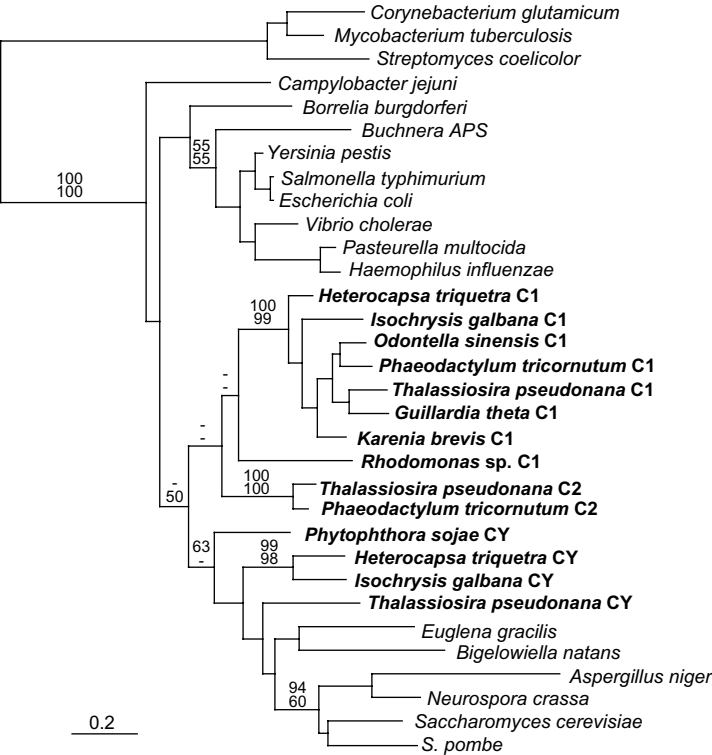

## Supplementary Figure Legends.

**Figure S1.** Alignment of the amino terminus of representative class II type A FBA genes, including all chromalveolate sequences. Chromalveolates are designated CY (cytosolic), C1 (plastid-targeted) and C2 (diatom specific plastid-targeted). The *Thalassiosira* C1 sequence is truncated.

**Figure S2.** Signal peptide predictions for FBA C1 sequences from (A) *Heterocapsa*, (B) *Isochrysis*, (C) *Odontella*, and (D) *Guillardia*. In each part, the top chart is the neural network prediction and the lower chart is the hidden Markov model (HMM) prediction. All sequences are predicted to encode signal peptides and both models predict similar or identical cut sites. All predictions carried out using SignalP version 3.0 (1).

**Figure S3.** Signal peptide predictions for FBA C2 sequences from (A) *Phaeodactylum*, and (B) *Thalassiosira*. Both sequences are predicted to encode signal peptides and both models predict similar or identical cut sites. Descriptions are as in Figure S2.

**Figure S4.** Signal peptide predictions for FBA CY sequences from (A) *Thalassiosira*, (B) *Isochrysis*, and (C) *Heterocapsa*. Descriptions are as in Figure S2.

**Figure S5.** Protein maximum likelihood phylogeny of class II type A FBA including partial sequences from the cryptomonad *Rhodomonas* and the haptophyte plastid-containing dinoflagellate *Karenia*. The phylogeny is inferred using PhyML and numbers at nodes correspond to PhyML bootstrap support. *Rhodomonas* (the much shorter sequence) is sister to the C1 clade and *Karenia* falls within C1 with strong support. *Karenia* shows no affinity to either *Isochrysis* or *Heterocapsa*, so the source of this enzyme is not clear.

1. **Bendtsen, J. D., H. Nielsen, G. von Heijne, and S. Brunak.** 2004. Improved prediction of signal peptides: SignalP 3.0. *J. Mol. Biol.* **340**:783-795.
